# Supplementary material
Source: publisher figshare collection journal article supplement (https://gsapubs.figshare.com/ndownloader/files/23301815)

Unraveling alteration timing in serpentinites and associated ultramafic rocks with magnetite (U-Th)/He geochronology

Emily H. G. Cooperdock<sup>1</sup> and Daniel F. Stockli<sup>1</sup>

<sup>1</sup>*Department of Geological Sciences, University of Texas at Austin, Austin, TX 78712-1692, U.S.A.*

## **MAGNETITE TRACE ELEMENT MEASUREMENT**

Trace elements (Mg, Al, Ti, V) were measured on magnetite grains from three 60  $\mu\text{m}$ -thick thin sections of the serpentinite. Laser spot analyses were measured on all visible magnetite grains of sufficient size from each thin section as either transects across the grain (7 grains on one thin section of the serpentinite) or as random points (16 grains on two thin sections of the serpentinite). The data from these measurements are reported in the manuscript Fig. 3. (See Supplement Table DR1 for LA-ICP-MS data and Supplement Fig. DR1 for additional grain transect data). Measurements were made on a single collector ThermoFisher Element II HR-ICP-MS with an attached Photonmachines Analyte G2 193 nm ArF excimer laser ablation system. The laser settings included a 70% laser energy, 6.35 J/cm<sup>2</sup> fluence, and 6 mJ energy. Spot sizes of 65  $\mu\text{m}$  were employed, and all spots were pre-ablated. GSD, the primary standard, was run between every four unknowns, and GSC was run between every 12 unknowns as the secondary standard. Analyses for each element in GSD (n = 29) and GSC (n=11) are reproducible within < 5% over the experiment, with the exception of V (25%) in GSC. Concentrations were calculated using Fe as an internal standard on Igor Pro Iolite software.

## **MAGNETITE PREPARATION AND (U-TH)/HE MEASUREMENT**

Whole rock samples were crushed and magnetite crystals were separated from the crushed whole rock separate by hand magnet. Individual magnetite grains were picked

based on size and morphology using an optical microscope (see Supplement Fig. DR2 for photomicrographs of thin sections). Single, euhedral magnetite grains greater than one millimeter were selected from the chlorite schist and crushed with mortar and pestle. Internal fragments without clear crystal faces were selected for CT-scanning. Since grain sizes ranged from hundreds of micrometers to over one millimeter in the serpentinite, two grain treatments were employed. Magnetite grains over a millimeter were crushed with mortar and pestle and internal fragments with no clear crystal faces were selected for CT-scanning. Magnetite grains between  $\sim 300\text{-}600\text{ }\mu\text{m}$  were hand picked based on euhedral morphology. These sub-mm grains were physically air abraded by placing 20-40 similarly sized grains into an air abrasion vessel at once and abrading at 6 psi for about 4 hours following the procedure reported in Blackburn et al., (2007). The abrasion conditions employed in this study are based on previous experiments that calibrated the pressure and time to effectively remove  $\sim 20\text{ }\mu\text{m}$  from the outside of magnetite.

Internal fragments and abraded grains were scanned using the X-Radia Micro-CT scanner at the University of Texas High-Resolution Computed Tomography Facility (UTCT). In order to fit within the  $5\text{ mm}^3$  scanning volume, 10-50 grains or internal fragments were scanned in a single run at  $\sim 6\text{ }\mu\text{m}$  resolution. The X-Ray CT data were used to screen grains and fragments for attached matrix material (serpentine or chlorite), and inclusions, which are otherwise impossible to see on a 3D scale in opaque minerals. (See Supplement Fig. DR3 for an example of CT data).

Individual aliquots were constructed using 2-7 internal fragments (from a single large crystal when possible), or abraded grains of similar size. The fragments or abraded grains that were clear of inclusions were wrapped into platinum tubes and laser heated

with a Photonmachine Diode Laser at a pre-specified pyrometer temperature for 10 min.  $^4\text{He}$  amounts were measured on a Blazers Prisma QMS-200 quadrupole mass spectrometer (QMS) by “spiking” with a  $^3\text{He}$  internal isotopic reference standard. Gas was purified in a Janis cryogenic trap, and a SAES NP10 getter before entering the QMS. Aliquots were reheated until the He yield became  $\leq 2\times$  blank values measured after each unknown. Final  $^4\text{He}$  amounts were calculated using a calibration against a manometrically-determined  $^4\text{He}$  standard. Gas blanks were measured between each aliquot to determine the background and drift during the run. Final gas amounts are all blank corrected corresponding to the blank following gas extraction of an unknown.

Samples were dissolved for U, Th, and Sm measurement using a two-step HF- $\text{HNO}_3$  and HCl hot plate dissolution procedure. After aliquots were unpacked from platinum tubes into Savillex beakers, a  $^{238}\text{U}$ ,  $^{230}\text{Th}$ , and  $^{149}\text{Sm}$  spike in 5%  $\text{HNO}_3$  was added. A 5:1 concentrated HF - 7N  $\text{HNO}_3$  mixture was added to the beakers, which were tightly sealed and heated at  $\sim 180^\circ\text{C}$  overnight. Samples were dried down to a small bead and 200  $\mu\text{l}$  of concentrated HCl was added to the beaker, which was tightly sealed and heated overnight at  $180^\circ\text{C}$ . After chloride conversion, the solution was dried down to a small bead and 100  $\mu\text{l}$  of 7N  $\text{HNO}_3$ , followed by 500  $\mu\text{l}$  of MilliQ  $\text{H}_2\text{O}$  were added in preparation for analysis on the Thermo Element 2 HR-ICP-MS. Final U-Th-Sm concentrations were calculated using isotope dilution with a mixed spike calibrated against a gravimetric 1 ppb U-Th-Sm standard solution.

## SUPPLEMENT TABLES

TABLE DR1. LA-ICP-MS SPOT ANALYSES ON MAGNETITE GRAINS FROM SERPENTINITE SAMPLE

| Grain                          | Grain<br>size<br>( $\mu\text{m}$ ) | # of<br>spots | Mg<br>(ppm) | SD*         | Ti<br>(ppm) | SD*        | V<br>(ppm) | SD* | Al<br>(ppm) | SD* |
|--------------------------------|------------------------------------|---------------|-------------|-------------|-------------|------------|------------|-----|-------------|-----|
| <u>Random Spot Analysis</u>    |                                    |               |             |             |             |            |            |     |             |     |
| 1                              | 523                                | 2             | 455         | 52          | 78          | 1          | 427        | 59  | 23          | 3   |
| 2                              | 597                                | 2             | 470         | 4           | 84          | 3          | 475        | 1   | 24          | 1   |
| 3                              | 726                                | 2             | 512         | 87          | 86          | 3          | 537        | 1   | 27          | 5   |
| 4                              | 313                                | 1             | 436         | 19          | 73          | 4          | 388        | 17  | 19          | 2   |
| 5                              | 296                                | 1             | 345         | 16          | 83          | 4          | 324        | 14  | 17          | 2   |
| 6                              | 504                                | 2             | 416         | 16          | 69          | 7          | 438        | 49  | 17          | 2   |
| 7                              | 1039                               | 3             | 575         | 53          | 183         | 89         | 543        | 36  | 35          | 7   |
| 8                              | 506                                | 1             | 466         | 68          | 55          | 1          | 420        | 5   | 18          | 1   |
| 9                              | 768                                | 2             | 490         | 18          | 54          | 4          | 358        | 47  | 20          | 2   |
| 10                             | 4202                               | 11            | 755         | 123         | 178         | 91         | 591        | 56  | 60          | 16  |
| 11                             | 606                                | 2             | 652         | 136         | 72          | 5          | 453        | 55  | 27          | 1   |
| 12                             | 949                                | 3             | 643         | 98          | 190         | 58         | 582        | 32  | 37          | 6   |
| 13                             | 1218                               | 4             | 806         | 221         | 123         | 56         | 549        | 71  | 43          | 22  |
| 14                             | 5734                               | 11            | 736         | 199         | 172         | 81         | 597        | 59  | 64          | 18  |
| 15                             | 619                                | 2             | 551         | 30          | 85          | 7          | 497        | 28  | 27          | 4   |
| 16                             | 681                                | 3             | 523         | 44          | 89          | 18         | 492        | 41  | 23          | 5   |
|                                |                                    |               |             |             |             |            |            |     |             |     |
| Grain-<br>Spot #               | Grain<br>size<br>( $\mu\text{m}$ ) | Mg<br>(ppm)   | SD*         | Ti<br>(ppm) | SD*         | V<br>(ppm) | SD*        |     |             |     |
| <u>Grain Transect Analysis</u> |                                    |               |             |             |             |            |            |     |             |     |
| 1-1                            | 1858                               | 333           | 18          | 59          | 8           | 315        | 14         |     |             |     |
| 1-2                            |                                    | 635           | 51          | 180         | 42          | 505        | 25         |     |             |     |
| 1-3                            |                                    | 497           | 29          | 131         | 6           | 607        | 30         |     |             |     |
| 1-4                            |                                    | 862           | 45          | 267         | 43          | 671        | 37         |     |             |     |
| 1-5                            |                                    | 1063          | 52          | 167         | 19          | 715        | 34         |     |             |     |
| 1-6                            |                                    | 644           | 26          | 153         | 24          | 647        | 23         |     |             |     |
| 1-7                            |                                    | 612           | 61          | 80          | 11          | 535        | 36         |     |             |     |
|                                |                                    |               |             |             |             |            |            |     |             |     |
| 2-1                            | 487                                | 365           | 17          | 52          | 5           | 309        | 8          |     |             |     |
| 2-1                            |                                    | 589           | 26          | 48          | 4           | 384        | 12         |     |             |     |
|                                |                                    |               |             |             |             |            |            |     |             |     |
| 3-1                            | 1518                               | 536           | 64          | 65          | 7           | 359        | 24         |     |             |     |
| 3-2                            |                                    | 461           | 19          | 67          | 4           | 442        | 14         |     |             |     |
| 3-3                            |                                    | 483           | 22          | 101         | 11          | 528        | 17         |     |             |     |
| 3-4                            |                                    | 446           | 20          | 132         | 19          | 580        | 15         |     |             |     |
| 3-5                            |                                    | 472           | 19          | 153         | 31          | 620        | 17         |     |             |     |

| Grain-Spot # | Grain size (μm) | Mg (ppm) | SD* | Ti (ppm) | SD* | V (ppm) | SD* |
|--------------|-----------------|----------|-----|----------|-----|---------|-----|
| 3-6          |                 | 644      | 29  | 180      | 42  | 652     | 20  |
| 3-7          |                 | 875      | 32  | 140      | 13  | 688     | 21  |
| 3-8          |                 | 991      | 31  | 124      | 9   | 703     | 20  |
| 3-9          |                 | 1339     | 57  | 122      | 8   | 707     | 22  |
| 3-10         |                 | 1030     | 43  | 157      | 20  | 719     | 25  |
| 3-11         |                 | 960      | 34  | 137      | 11  | 687     | 24  |
| 3-12         |                 | 904      | 40  | 132      | 11  | 673     | 24  |
| 3-13         |                 | 743      | 35  | 143      | 15  | 620     | 22  |
| 3-14         |                 | 529      | 22  | 107      | 12  | 568     | 18  |
| 4-1          | 5500            | 679      | 57  | 197      | 47  | 641     | 20  |
| 4-2          |                 | 554      | 26  | 110      | 16  | 663     | 24  |
| 4-3          |                 | 752      | 25  | 114      | 6   | 70      | 21  |
| 4-4          |                 | 1053     | 39  | 139      | 12  | 717     | 30  |
| 4-5          |                 | 1125     | 40  | 150      | 21  | 747     | 26  |
| 4-6          |                 | 1118     | 51  | 137      | 19  | 764     | 32  |
| 4-7          |                 | 1151     | 47  | 107      | 8   | 773     | 31  |
| 4-8          |                 | 1191     | 50  | 188      | 73  | 794     | 36  |
| 4-9          |                 | 1136     | 34  | 234      | 78  | 780     | 23  |
| 4-10         |                 | 1132     | 35  | 117      | 9   | 768     | 22  |
| 4-11         |                 | 1092     | 28  | 236      | 82  | 749     | 12  |
| 4-12         |                 | 961      | 39  | 140      | 13  | 735     | 21  |
| 4-13         |                 | 956      | 28  | 298      | 67  | 716     | 22  |
| 4-14         |                 | 869      | 32  | 188      | 85  | 723     | 21  |
| 4-15         |                 | 904      | 39  | 179      | 49  | 715     | 29  |
| 4-16         |                 | 829      | 48  | 116      | 8   | 700     | 36  |
| 4-17         |                 | 658      | 35  | 140      | 17  | 645     | 32  |
| 4-18         |                 | 1260     | 120 | 71       | 6   | 401     | 23  |
| 5-1          | 2021            | 432      | 20  | 73       | 8   | 473     | 22  |
| 5-2          |                 | 573      | 32  | 152      | 49  | 557     | 26  |
| 5-3          |                 | 484      | 26  | 118      | 8   | 610     | 24  |
| 5-4          |                 | 520      | 24  | 117      | 7   | 622     | 25  |
| 5-5          |                 | 599      | 29  | 138      | 16  | 638     | 28  |
| 5-6          |                 | 950      | 260 | 100      | 9   | 608     | 39  |
| 5-7          |                 | 707      | 37  | 116      | 9   | 639     | 28  |
| 5-8          |                 | 665      | 27  | 106      | 9   | 634     | 30  |
| 5-9          |                 | 585      | 28  | 198      | 54  | 646     | 30  |
| 5-10         |                 | 689      | 25  | 115      | 8   | 627     | 26  |
| 5-11         |                 | 609      | 33  | 625      | 40  | 549     | 27  |
| 5-12         |                 | 475      | 22  | 91       | 7   | 495     | 22  |
| 6-1          | 796             | 480      | 24  | 79       | 5   | 539     | 23  |
| 6-2          |                 | 985      | 38  | 305      | 27  | 635     | 24  |
| 6-3          |                 | 1075     | 38  | 148      | 10  | 682     | 22  |
| 6-4          |                 | 1006     | 34  | 672      | 38  | 663     | 21  |

| Grain-Spot # | Grain size (μm) | Mg (ppm) | SD* | Ti (ppm) | SD* | V (ppm) | SD* |
|--------------|-----------------|----------|-----|----------|-----|---------|-----|
| 6-5          |                 | 604      | 27  | 129      | 8   | 549     | 19  |
| 7-1          | 2003            | 452      | 24  | 80       | 6   | 471     | 21  |
| 7-2          |                 | 599      | 30  | 364      | 83  | 595     | 30  |
| 7-3          |                 | 690      | 29  | 130      | 10  | 620     | 29  |
| 7-4          |                 | 807      | 37  | 290      | 150 | 653     | 24  |
| 7-5          |                 | 698      | 25  | 223      | 24  | 639     | 21  |
| 7-6          |                 | 616      | 30  | 163      | 14  | 648     | 26  |
| 7-7          |                 | 521      | 28  | 223      | 73  | 594     | 29  |
| 7-8          |                 | 427      | 25  | 104      | 6   | 554     | 23  |

\* Reported SD errors are the standard deviation of averaged laser spot analyses. If n=1, reported errors are standard error on the individual analyses.

| Aliquot name                                                                                                                                 | Age<br>(Ma) | U<br>(ppb) | Th<br>(ppb) | Sm<br>(ppb) | <sup>4</sup> He<br>(nmol/g) | Th/U | Mass<br>(μg) | # of grains<br>or fragments |
|----------------------------------------------------------------------------------------------------------------------------------------------|-------------|------------|-------------|-------------|-----------------------------|------|--------------|-----------------------------|
| <u>Serpentinite</u>                                                                                                                          |             |            |             |             |                             |      |              |                             |
| <i>Multi-grain aliquots of individually abraded grains (300-600 μm)</i>                                                                      |             |            |             |             |                             |      |              |                             |
| mg13KA03-1                                                                                                                                   | 3.3 ± 0.1   | 4          | 247         | 11          | 0.0011                      | 56   | 736          | 3                           |
| mg13KA03-5                                                                                                                                   | 3.4 ± 0.1   | 5          | 488         | 32          | 0.0022                      | 90   | 516          | 3                           |
| mg13KA03-7                                                                                                                                   | 2.9 ± 0.5   | 5          | 18          | 2           | 0.0001                      | 3    | 946          | 3                           |
| mg13KA03-8                                                                                                                                   | 4.3 ± 0.4   | 3          | 50          | 3           | 0.0004                      | 15   | 824          | 4                           |
| mg13KA03ab-1                                                                                                                                 | 2.7 ± 0.3   | 6          | 156         | 12          | 0.0006                      | 27   | 825          | 4                           |
| mg13KA03ab-4                                                                                                                                 | 1.8 ± 0.7   | 8          | 17          | 4           | 0.0001                      | 2    | 948          | 3                           |
| mg13KA03ab-7                                                                                                                                 | 2.4 ± 0.2   | 7          | 65          | 10          | 0.0003                      | 9    | 1114         | 3                           |
| mg13KA03ab-11                                                                                                                                | 3.6 ± 1.6   | 3          | 9           | 4           | 0.0001                      | 3    | 960          | 2                           |
| mg13KA03ab-14                                                                                                                                | 3.3 ± 0.6   | 6          | 54          | 7           | 0.0003                      | 9    | 724          | 7                           |
| <i>Internal fragments from single large grain (≥ mm)</i>                                                                                     |             |            |             |             |                             |      |              |                             |
| mg13KA03ab-28                                                                                                                                | 8.8 ± 0.8   | 3          | 32          | 12          | 0.0005                      | 11   | 2377         | 4                           |
| mg13KA03ab-29                                                                                                                                | 15.3 ± 1.8  | 2          | 7           | 2           | 0.0003                      | 3    | 1078         | 4                           |
| mg13KA03ab-30                                                                                                                                | 6.8 ± 1.2   | 11         | 39          | 17          | 0.0007                      | 4    | 2487         | 7                           |
| <u>Chlorite schist</u>                                                                                                                       |             |            |             |             |                             |      |              |                             |
| <i>Internal fragments from large grains (≥ mm)</i>                                                                                           |             |            |             |             |                             |      |              |                             |
| mg07SY09-1                                                                                                                                   | 13.0 ± 1.8  | 6          | 6           | 698         | 0.0010                      | 0.9  | 315          | 4                           |
| mg07SY09-3                                                                                                                                   | 21.0 ± 1.1  | 26         | 15          | 1045        | 0.0043                      | 0.6  | 826          | 3                           |
| mg07SY09-8                                                                                                                                   | 13.2 ± 0.5  | 27         | 53          | 1425        | 0.0037                      | 2    | 576          | 3                           |
| mg07SY09-11                                                                                                                                  | 20.1 ± 0.7  | 21         | 16          | 174         | 0.0028                      | 0.8  | 1452         | 3                           |
| mg07SY09-14                                                                                                                                  | 16.0 ± 0.2  | 43         | 217         | 3480        | 0.0106                      | 5    | 705          | 3                           |
| mg07SY09-17                                                                                                                                  | 13.5 ± 0.1  | 84         | 412         | 6186        | 0.0170                      | 5    | 582          | 3                           |
| mg07SY09-21                                                                                                                                  | 15.5 ± 0.6  | 5          | 15          | 828         | 0.0013                      | 3    | 894          | 2                           |
| mg07SY09-20                                                                                                                                  | 43.7 ± 0.5  | 27         | 13          | 1479        | 0.0099                      | 0.5  | 223          | 3                           |
| mg07SY09-22                                                                                                                                  | 45.0 ± 0.5  | 13         | 12          | 592         | 0.0051                      | 0.9  | 2205         | 7                           |
| mg07SY09-23                                                                                                                                  | 30.5 ± 0.9  | 3          | 6           | 144         | 0.0009                      | 2    | 1302         | 2                           |
| Mass refers to the mass of the aliquot, not individual grains. # of grains or fragments refers to the number combined into a single aliquot. |             |            |             |             |                             |      |              |                             |

## SUPPLEMENT FIGURES

Fig. DR1: Additional LA-ICP-MS transects measuring Mg, V and Ti across four magnetite grains from the serpentinite. Each symbol represents a laser spot (65  $\mu\text{m}$  spot size).

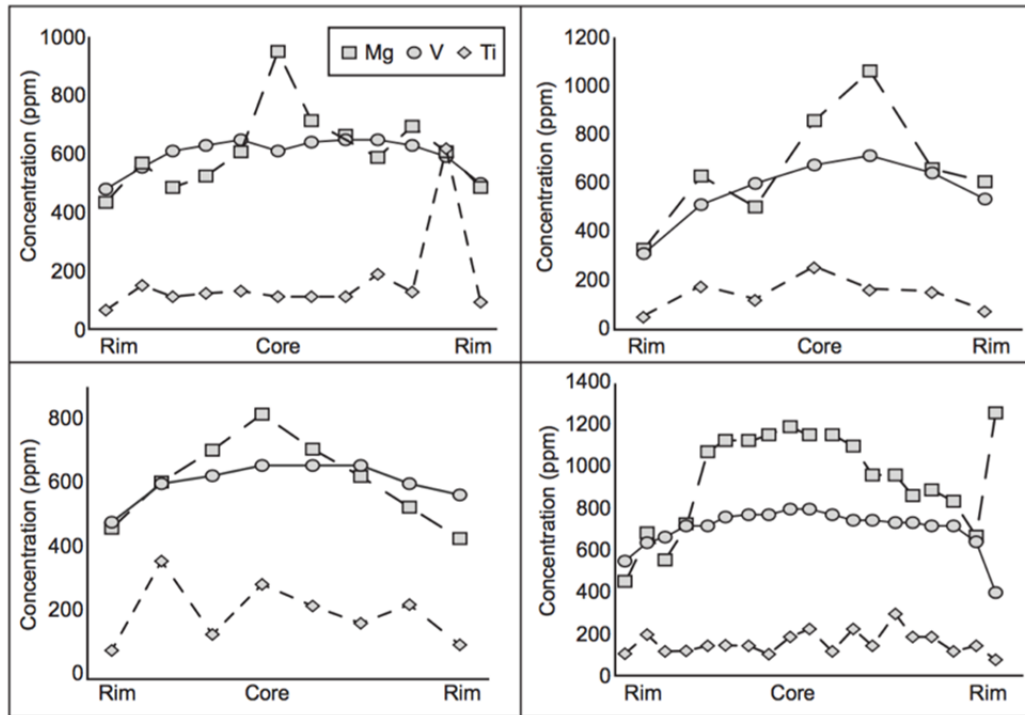

Fig DR2.: Photomicrographs of serpentinite and chlorite schist thin sections. A- C are serpentinite, D is chlorite schist.

- A) Plane polarized light through talc-rich section of serpentinite. General mineralogy: serpentine, talc, magnetite and minor chlorite.
- B) Cross-polarized light for the same thin section as A
- C) Second scanned thin section of serpentinite in less talc-rich section
- D) Chlorite schist thin section. Large magnetite are euhedral. Other opaque mineral is ilmenite. General mineralogy: chlorite, epidote, rutile, ilmenite, magnetite, apatite and < 6  $\mu\text{m}$  zircon.



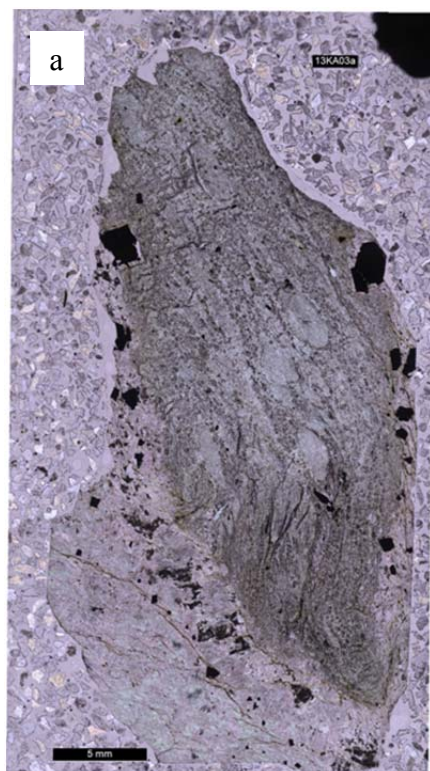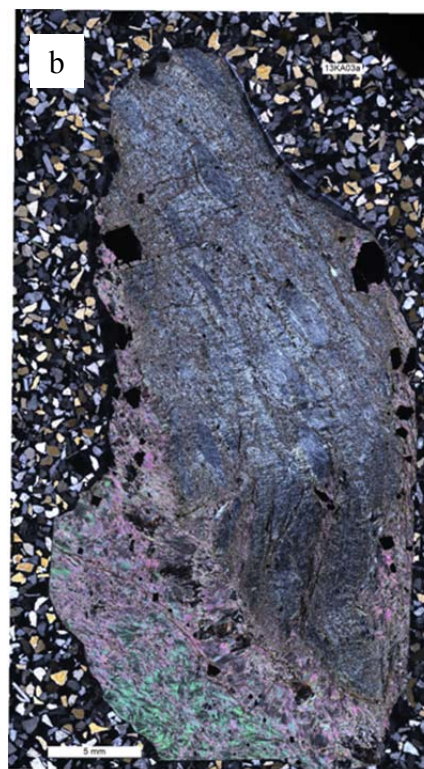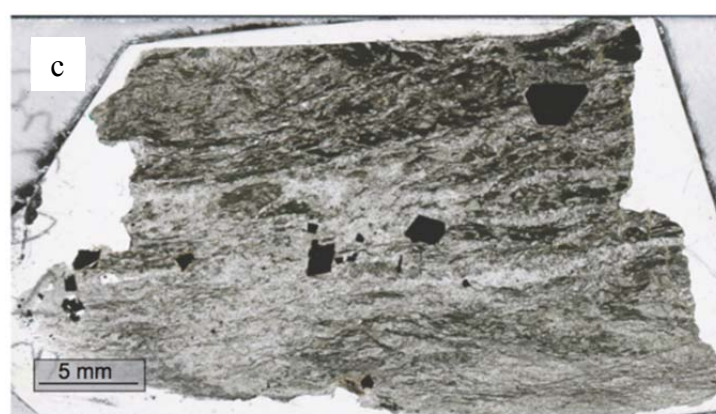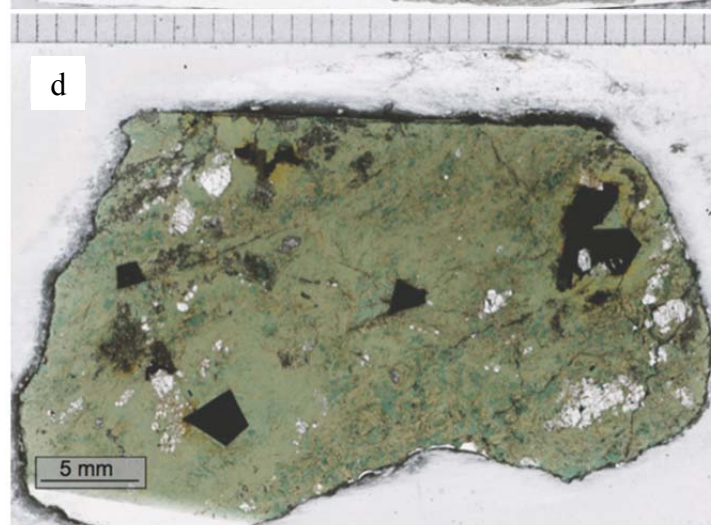

Fig. DR3 (scale bar is 1 mm): Example of CT Data: a) Optical microscope photograph of unabraded magnetite grains mounted on double-sided sticky tape in preparation for CT scanning. b) 3-D isosurface rendering of magnetite grains constructed using the X-Ray CT data and Avizo software. c) Volume rendering of magnetite grains with inclusions that have a different density from the magnetite. Inclusions are highlighted in bright pink. The grains with these inclusions were avoided for analysis.

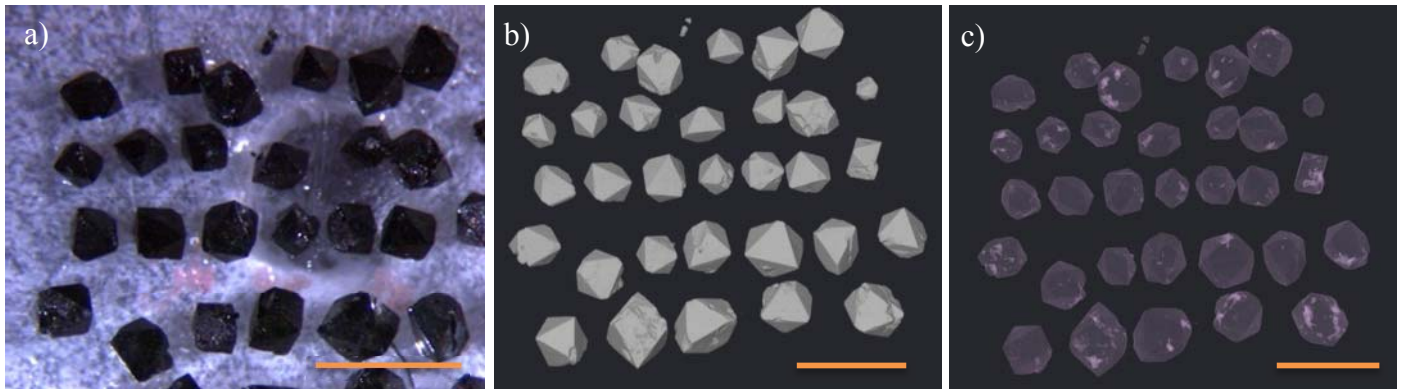

Supplement: Supplementary file 1 [file 23301815]
